# Supplementary material for: Selection and Evaluation of Reference Genes for Reverse Transcription-Quantitative PCR Expression Studies in a Thermophilic Bacterium Grown under Different Culture Conditions
Source: PLoS One. 2015 Jun 26;10(6):e0131015. doi: 10.1371/journal.pone.0131015 (PMC4482720; doi:10.1371/journal.pone.0131015)
Supplement: S1 Table — (XLSX) [file pone.0131015.s018.xlsx]

## Sheet: TableS1. Standard Curve Data
Target	Primer Sequence (5'-3')	Slope	Y-intercept	r2	PCR E
gyrB	F: TTTATGCCGTGGTAAGCGTG	-3.3	35.56	0.999	99.9
	R: GCGGTAGAAGAAGGTGAGGA
polA2	F: CCTTCAGTACCGGGAGCTTT	-3.3	36.57	0.997	99.1
	R: CTCCCGGATGCTCTTCACC
rpoC	F: TTGGAGGAGATGAAGCACCC	-3.86	41.43	0.996	81.5
	R: ACACCTCGTCCTTGATGTCC
