# Supplementary material for: Selection and Evaluation of Reference Genes for Reverse Transcription-Quantitative PCR Expression Studies in a Thermophilic Bacterium Grown under Different Culture Conditions
Source: PLoS One. 2015 Jun 26;10(6):e0131015. doi: 10.1371/journal.pone.0131015 (PMC4482720; doi:10.1371/journal.pone.0131015)
Supplement: S6 Table — (XLSX) [file pone.0131015.s023.xlsx]

## Sheet: TableS. NF Interra all conditio
TableS. NormFinder Inter- and Intragroup Values under all conditions combined (n=45).
	dnaK	gap	gly	gyrA	gyrB	infA	pfk	polA2	20940	19900	rpoC
Intragroup Var - Glu/NO3	0.0764268	0.0735171	0.731536	0.119619	0.0528377	0.330104	0.181648	0.00875054	0.0829041	0.199603	0.117739
Intragroup Var - Lac/NO3	0.0291386	0.138689	0.0873224	0.221913	0.416686	0.119574	0.109741	0.0904561	0.00568252	0.720542	0.0611393
Intragroup Var - TYG	0.0256897	0.0133171	0.0344945	0.0349508	0.021165	0.00701041	0.119877	0.00883616	0.0270569	0.0145757	0.00812291
Intragroup Var - Iron	0.0408844	0.00514025	0.0457435	0.0809249	0.11083	0.22251	0.0105926	0.136138	0.00476996	0.167442	0.183013
Intragroup Var - MW	0.32141	0.245923	2.5526	0.0202439	0.0188988	0.0556559	0.0644098	0.00117851	0.905938	0.333189	0.179085
Intragroup Var - Oven	0.0136865	0.114067	0.115474	0.225115	0.129723	0.00332114	0.96477	0.00238297	0.140754	0.0760183	0.379264
Intergroup Var - Glu/NO3	-0.594877	0.264798	0.335159	0.249588	0.0977806	-0.0428708	0.214054	-0.0457499	-0.690642	-0.244132	0.456892
Intergroup Var - Lac/NO3	-0.602269	0.0578683	0.387762	0.394436	0.432052	-0.184928	-0.371692	0.0658408	-0.285722	0.402184	-0.295531
Intergroup Var - TYG	0.23049	-0.0592173	-1.00977	-0.228925	-0.326831	0.285645	0.38002	-0.11907	0.585562	-0.0966474	0.358741
Intergroup Var - Iron	0.184859	-0.00652173	0.964229	0.196854	0.453855	0.0463155	1.13529	-0.732748	-0.846321	-0.66042	-0.735393
Intergroup Var - MW	0.316633	0.0671382	0.302765	-0.414667	-0.540689	-0.26826	-0.618007	0.365832	0.421413	0.32177	0.0460727
Intergroup Var - Oven	0.465164	-0.324066	-0.98015	-0.197285	-0.116167	0.164098	-0.739664	0.465896	0.81571	0.277245	0.169219
